# Supplementary material for: 3D graphene preparation via covalent amide functionalization for efficient metal-free electrocatalysis in oxygen reduction
Source: PubMed Central journal article supplement (PMC5327434; doi:10.1038/srep43279), 2017-02-27
Supplement: srep43279-s1.pdf [file srep43279-s1.pdf]

Supporting Information of

3D graphene preparation via covalent amide functionalization for efficient metal-free electrocatalysis in oxygen reduction

Mohammad Shamsuddin Ahmed, Young-Bae Kim\*

Department of Mechanical Engineering, Chonnam National University, Gwangju, Republic of Korea. Tel.: +82 62 5301677, \*E-mail: [ybkim@chonnam.ac.kr](mailto:ybkim@chonnam.ac.kr)

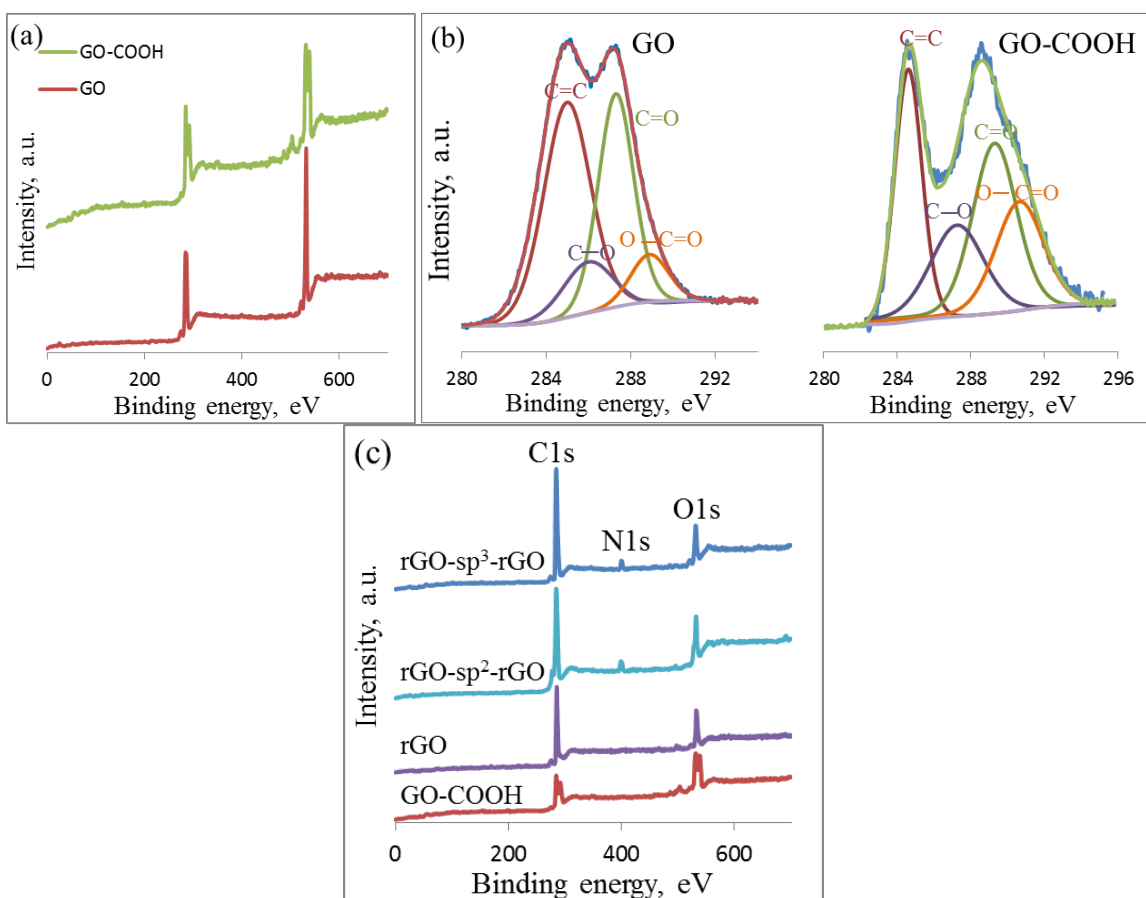

**Figure S1:** XPS survey spectra (a), core level of C1s spectra (b) of GO and GO-COOH and XPS survey spectra of GO-COOH, rGO, rGO-sp<sup>2</sup>-rGO and rGO-sp<sup>3</sup>-rGO (c).

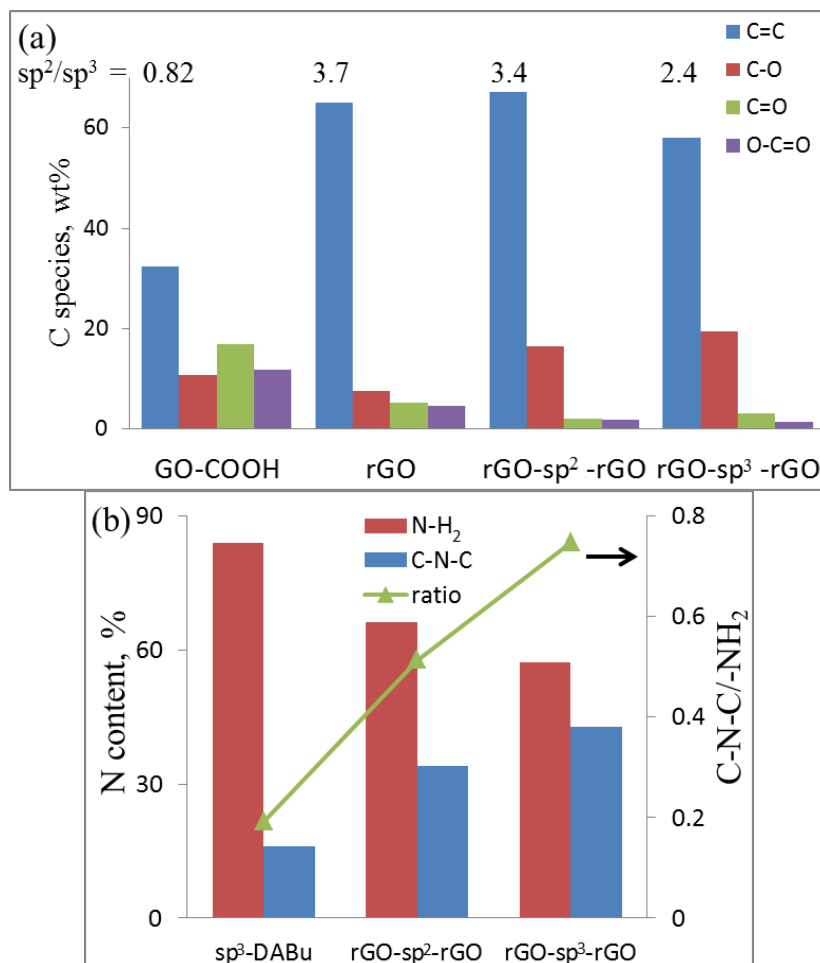

**Figure S2:** The C-species content calculated from the wt% of C for all samples (a) N-species content calculated from the wt% of N for  $sp^3$ -DABu, rGO- $sp^2$ -rGO and rGO- $sp^3$ -rGO (b).

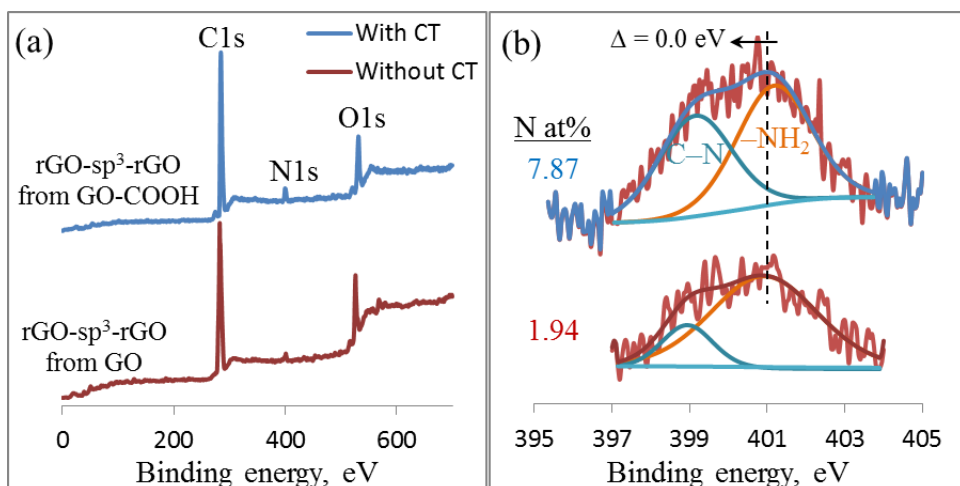

**Figure S3:** XPS survey spectra (a), core level of N1s spectra (b) of rGO-sp<sup>3</sup>-rGO samples from without (GO) and with (GO-COOH) conversion treatment (CT) precursor.

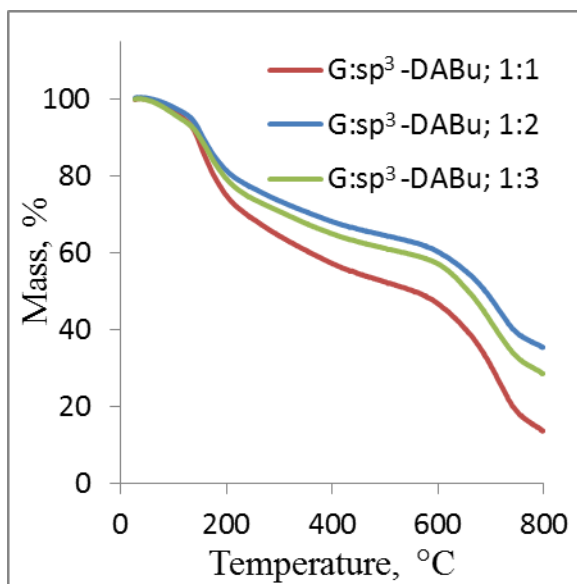

**Figure S4:** TGA curves of three different rGO-sp<sup>3</sup>-rGO materials which prepared by three different w/w ratios of GO-COOH and sp<sup>3</sup>-DABu (1:1, 1:2, and 1:3).

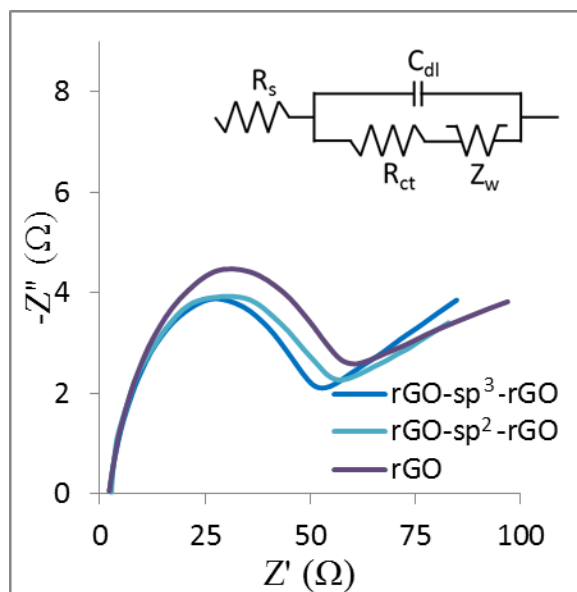

**Figure S5:** Nyquist plots of rGO/GCE, rGO-sp<sup>2</sup>-rGO/GCE and rGO-sp<sup>3</sup>-rGO/GCE.

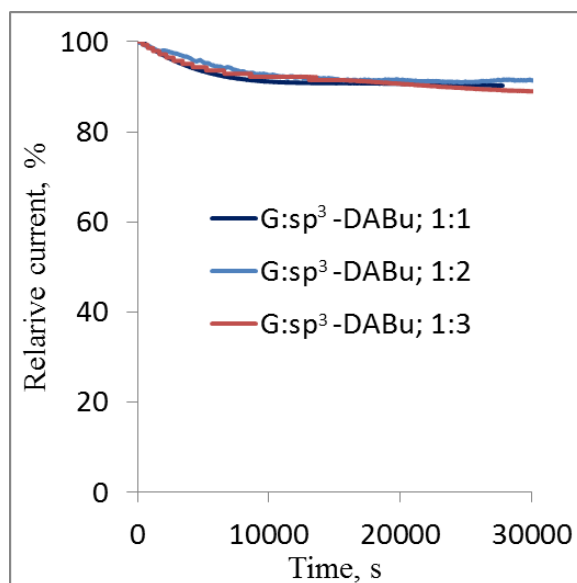

**Figure S6:** CA curves of three different rGO-sp<sup>3</sup>-rGO catalysts which prepared by three different w/w ratios of GO-COOH and sp<sup>3</sup>-DABu (1:1, 1:2, and 1:3).

**Table S1:** The comparison of ORR activity of the metal-free catalysts.

| Catalyst                         | Electrolyte | $E_{\text{onset}}$ (Ref. electrode) | $n$ value     | References |
|----------------------------------|-------------|-------------------------------------|---------------|------------|
| PDDA <sup>a</sup> -graphene      | 0.1 M KOH   | -0.105 V (vs. Ag/AgCl)              | 3.5-4         | [9]*       |
| P-G <sup>b</sup>                 | 0.1 M KOH   | -0.112 V (vs. Ag/AgCl)              | 3.85 (0.4 V)  | [11]*      |
| N-graphene                       | 0.1 M KOH   | -0.17 V (vs. Ag/AgCl)               | 3.6-4         | [16]       |
| B <sub>3</sub> CNTs <sup>c</sup> | 1 M NaOH    | -0.13 V (vs. Ag/AgCl)               | 2.5 (0.7 V)   | [24]*      |
| TDMAC <sup>d</sup> -RGO          | 0.1 M KOH   | -0.24 V (vs. Ag/AgCl)               | 3-4           | [32]       |
| Acr@MWCNTs                       | 0.1 M KOH   | -0.14 V (vs. Ag/AgCl)               | 3.2 (-1 V)    | [33]       |
| NS-C <sup>e</sup> -1100          | 0.1 M KOH   | 0.05 V (vs. Ag/AgCl)                | 3.4-3.8       | [34]*      |
| AG <sup>f</sup>                  | 0.1 M KOH   | -0.04 V (vs. Ag/AgCl)               | 3.3-4         | [41]       |
| Py <sup>g</sup> -EGO             | 0.1 M KOH   | -0.2 V (vs. Ag/AgCl)                | 3.74 (-0.4 V) | [42]       |
| S-graphene <sup>h</sup> -1050    | 0.1 M KOH   | -0.08 V (vs. Ag/AgCl)               | 3.82 (-0.3 V) | [43]       |
| NPC <sup>i</sup>                 | 0.1 M KOH   | -0.04 (vs. Ag/AgCl)                 | 3.7 (-0.6 V)  | [60]       |
| rGO-sp <sup>3</sup> -rGO         | 0.1 M KOH   | -0.1 V (vs. Ag/AgCl)                | 3.95-3.98     | This work  |

<sup>a</sup>poly(diallyldimethylammonium chloride), <sup>b</sup>plasma-treated graphene, <sup>c</sup>boron-doped carbon nanotubes, <sup>d</sup>tridodecylmethylammonium chloride, <sup>e</sup>sulfur and nitrogen codoped carbon, <sup>f</sup>amino-functionalized graphene, <sup>g</sup>pyridine functionalized graphene, <sup>h</sup>sulfur-doped graphene, <sup>i</sup>nitrogen self-doped porous carbon, \*converted V vs. Ag/AgCl.
